## FORMAL COMMENT

## Seaweeds for carbon dioxide removal (CDR)—Getting the science right

Max Troell<sup>1,2\*</sup>, Catriona Hurd<sup>3</sup>, Thierry Chopin<sup>4</sup>, Barry A. Costa-Pierce<sup>5</sup>, Mark J. Costello<sup>5</sup>

**1** The Beijer Institute, Royal Swedish Academy of Sciences, Stockholm, Sweden, **2** Stockholm Resilience Centre, Stockholm University, Stockholm, Sweden, **3** Institute for Marine and Antarctic Studies, University of Tasmania, Hobart, Australia, **4** Seaweed and Integrated Multi-Trophic Aquaculture Research Laboratory, University of New Brunswick, Saint John, New Brunswick, Canada, **5** Faculty of Biosciences & Aquaculture, Nord University, Bodø, Norway

\* [max@beijer.kva.se](mailto:max@beijer.kva.se)

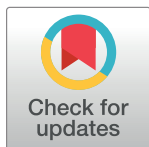

To keep global warming < 2°C, Almaraz et al. [1] highlight the need to drastically reduce greenhouse gas emissions from food production and remove atmospheric carbon dioxide by 2050. They provided an expert analysis of the potential of terrestrial based biological methods of carbon dioxide removal (CDR), including technologies that “demonstrated high impact potential supported by peer-reviewed literature”. However, scientific rigour was not applied to their brief consideration of marine CDR strategies, specifically ocean afforestation which is the deliberate expansion of seaweed (macroalgal) aquaculture into the open ocean where they do not naturally grow, and the cultivated biomass sunk to the deep ocean for CDR. Ocean afforestation (OAF) is subject of intense debate [2–5] and peer-reviewed literature questioning its application for CDR were available before Almaraz et al. submission. Here we highlight some key points missed by Almaraz et al. to be considered prior to investments in large scale OAF.

## OPEN ACCESS

**Citation:** Troell M, Hurd C, Chopin T, Costa-Pierce BA, Costello MJ (2024) Seaweeds for carbon dioxide removal (CDR)—Getting the science right. *PLOS Clim* 3(3): e0000377. <https://doi.org/10.1371/journal.pclm.0000377>

**Editor:** Nouredine Benkeblia, University of the West Indies, JAMAICA

**Received:** November 15, 2023

**Accepted:** February 6, 2024

**Published:** March 1, 2024

**Copyright:** © 2024 Troell et al. This is an open access article distributed under the terms of the [Creative Commons Attribution License](https://creativecommons.org/licenses/by/4.0/), which permits unrestricted use, distribution, and reproduction in any medium, provided the original author and source are credited.

**Funding:** The authors received no specific funding for this work.

**Competing interests:** The authors have declared that no competing interests exist.

1. All CDR methods will be required to undergo Monitoring, Reporting and Verification (MRV) to ensure that CO<sub>2</sub> removed from the atmosphere is securely stored and does not return to the atmosphere in the near future [6]. For marine systems, MRV is particularly difficult because of the complexity of measuring air-sea CO<sub>2</sub> equilibration [7–9]. Any seaweeds reaching the deep ocean may form a carbon storage pool but this is not directly linked to CDR. This is because in the open ocean, it takes on average 1 year for CO<sub>2</sub> to enter seawater and replace the CO<sub>2</sub> removed via seaweed photosynthesis; e.g. for open ocean *Sargassum* spp. populations, when air-sea CO<sub>2</sub> equilibration is accounted for, CDR is just 6–33% of the maximal potential [10]. This is explained by the water body from which *Sargassum* removed CO<sub>2</sub> being subducted under another water body before full equilibrium is reached [9, 10].
2. Estimates of the oceanic regions where seaweeds could be cultivated are based on inorganic nitrogen (nitrate) inventories [2, 3, 11]. Productivity of 30% of the global ocean is iron limited preventing healthy seaweed growth [12].
3. There are potential side effects that may result from an ‘ecological invasion’ of the open ocean by large scale seaweed farms in which highly diverse native phytoplanktonic communities are replaced by mono-cultured seaweeds [3, 13]: among them, nutrient re-allocation from phytoplankton to seaweeds; allelopathy, which will likely alter oceanic food webs; and release of climate reactive volatile organic compounds which may affect cloud dynamics and solar radiation [13].

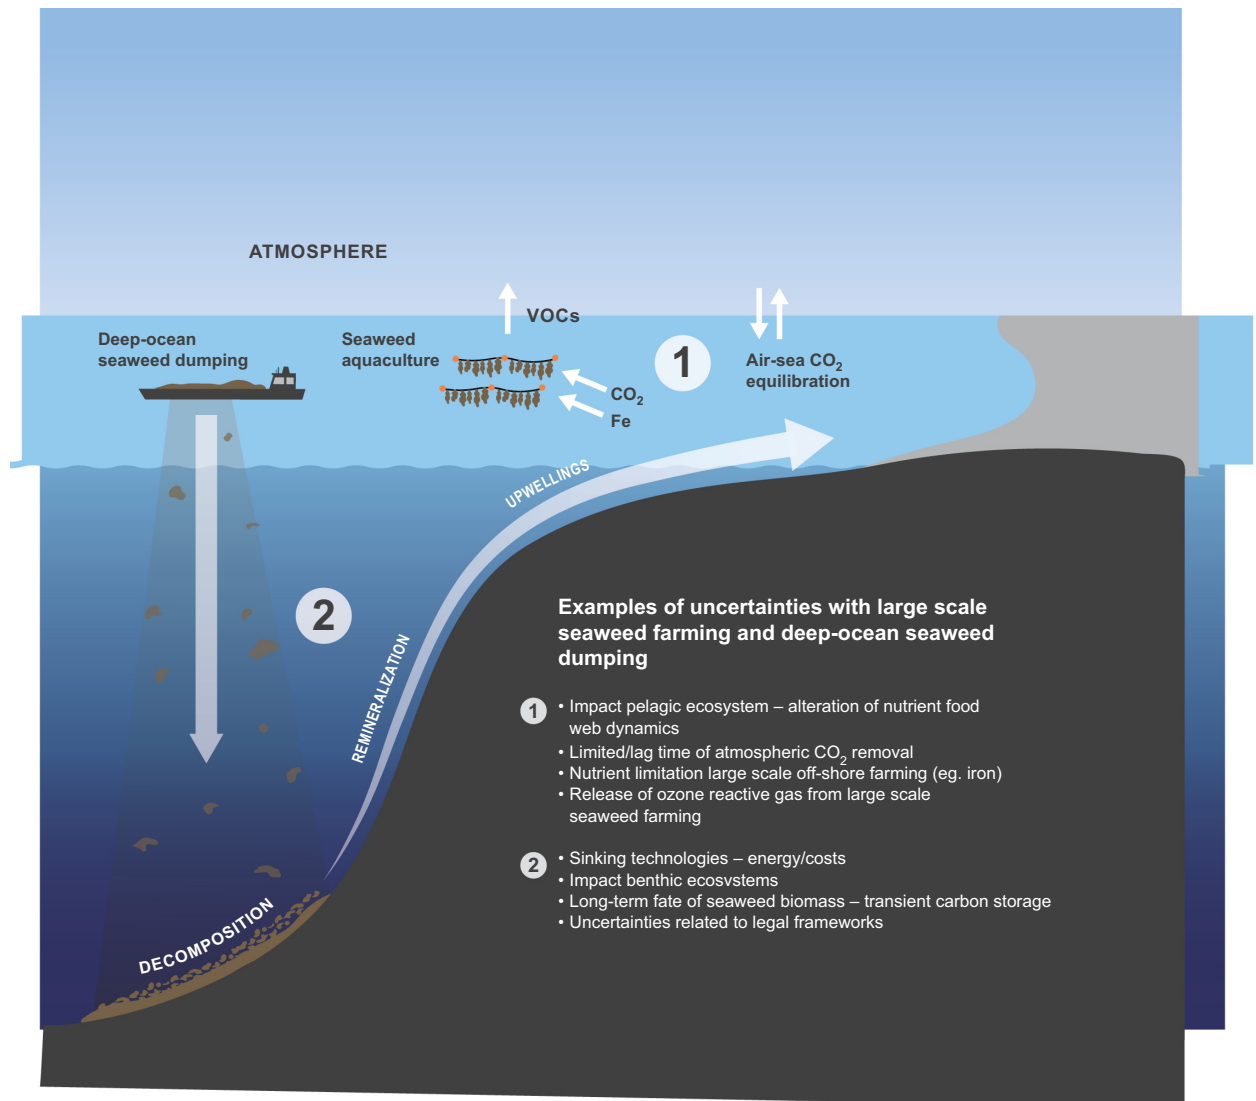

**Fig 1. Examples of uncertainties with 1) large scale seaweed farming and 2) deep-ocean seaweed dumping (from references used in the text).**

<https://doi.org/10.1371/journal.pclm.0000377.g001>

4. The fate of seaweed biomass accumulating on the deep-ocean floor is uncertain. It risks impacting negatively deep sea ecosystems [14] and seaweed biomass not making it to the ocean floor will undergo elemental recycling and transformation to CO<sub>2</sub>. Time scales for carbon decomposition and remineralization, as well as movement of seaweed biomass, are unknown, risking only transient carbon “sequestration” and not CDR on a climate-relevant time scale [15]. Fig 1 illustrates key uncertainties associated with large scale seaweed farming and deep-ocean seaweed sinking.

Studies like Almaraz et al. [1] are important for navigating the portfolio of CDR solutions; however, any inclusion needs to be supported by rigorous evaluation of net storage capacity (i.e. MRV) as well as feasibility (costs, infrastructure, environmental impacts, societal issues, etc.) to assess the true CDR potential. The risk may otherwise be development of misguided policies.

## Author Contributions

**Conceptualization:** Max Troell.

**Project administration:** Max Troell.

**Writing – original draft:** Max Troell.

**Writing – review & editing:** Max Troell, Catriona Hurd, Thierry Chopin, Barry A. Costa-Pierce, Mark J. Costello.

## References

1. Almaraz M, Houlton BZ, Clark M, Holzer I, Zhou Y, Rasmussen L, et al. Model-based scenarios for achieving net negative emissions in the food system. *PLOS Climate*. 2023; 2(9), e0000181.
2. DeAngelo J, Saenz BT, Arzeno-Soltero IB, Frieder CA, Long MC, Hamman J, et al. Economic and biophysical limits to seaweed farming for climate change mitigation. *Nature plants*. 2023; 9(1): 45–57. <https://doi.org/10.1038/s41477-022-01305-9> PMID: 36564631
3. Wu J, Keller DP, Oschlies A. Carbon dioxide removal via macroalgae open-ocean mariculture and sinking: an Earth system modeling study. *Earth System Dynamics*. 2023; 14(1), 185–221.
4. Hurd CL, Law CS, Bach LT, Britton D, Hovenden M, Paine ER, et al. Forensic carbon accounting: assessing the role of seaweeds for carbon sequestration. *Journal of Phycology*. 2022; 58(3): 347–363. <https://doi.org/10.1111/jpy.13249> PMID: 35286717
5. Ricart AM, Krause-Jensen D, Hancke K, Price NN, Masqué P, Duarte C, et al. Sinking seaweed in the deep ocean for carbon neutrality is ahead of science and beyond the ethics. *Environmental Research Letters*. 2022; 17(8): 081003.
6. Cadman T, Hales R. COP26 and a framework for future global agreements on carbon market integrity. *The International Journal of Social Quality*. 2022; 12(1): 76–99.
7. Orr J. C., & Sarmiento J. L. (1992). Potential of marine macroalgae as a sink for CO<sub>2</sub>: Constraints from a 3-D general circulation model of the global ocean. *Water, Air, and Soil Pollution*, 64, 405–421.
8. Bach LT, Ho DT, Boyd PW, Tyka MD. Toward a consensus framework to evaluate air–sea CO<sub>2</sub> equilibration for marine CO<sub>2</sub> removal. *Limnology and Oceanography Letters*. 2023; 8: 685–691.
9. Hurd CL, Gattuso JP, Boyd PW. Air-sea carbon dioxide equilibrium: Will it be possible to use seaweeds for carbon removal offsets?. *J Phycol*. 2023; 60(1): 4–14. <https://doi.org/10.1111/jpy.13405> PMID: 37943584
10. Bach LT, Tamsitt V, Gower J, Hurd CL, Raven JA, Boyd PW, et al. Testing the climate intervention potential of ocean afforestation using the Great Atlantic Sargassum belt. *Nat. Commun*. 2021; 12: 2556. <https://doi.org/10.1038/s41467-021-22837-2> PMID: 33963184
11. Froehlich HE, Afflerbach JC, Frazier M, Halpern BS. Blue growth potential to mitigate climate change through seaweed offsetting. *Current Biology*. 2019; 29(18): 3087–3093. <https://doi.org/10.1016/j.cub.2019.07.041> PMID: 31474532
12. Paine ER, Boyd PW, Strzepek RF, Ellwood M, Brewer EA, Diaz-Pulido G, et al. Iron limitation of kelp growth may prevent ocean afforestation. *Communications Biology*. 2023; 6: 607. <https://doi.org/10.1038/s42003-023-04962-4> PMID: 37280329
13. Boyd PW, Bach LT, Hurd CL, Paine E, Raven JA, Tamsitt V. Potential negative effects of ocean afforestation on offshore ecosystems. *Nature ecology & evolution*. 2022; 6(6): 675–683. <https://doi.org/10.1038/s41559-022-01722-1> PMID: 35449458
14. Levin LA, Alfaro-Lucas JM, Colaço A, Cordes EE, Craik N, Danovaro R, et al. Deep-sea impacts of climate interventions. *Science*. 2023; 379(6636): 978–981. <https://doi.org/10.1126/science.ade7521> PMID: 36893246
15. Siegel DA, DeVries T, Doney SC, Bell T. Assessing the sequestration time scales of some ocean-based carbon dioxide reduction strategies. *Environmental Research Letters*. 2021; 16(10): 104003.
